# Supplementary material for: Easy-to-use spatial Random Forest-based downscaling-calibration method for producing high resolution and accurate precipitation data
Source: Copernicus journal article supplement (doi:10.5194/hess-2021-332), 2021-07-01
Supplement: Supplementary file [file hess-2021-332-AC7-supplement.pdf]

Dear Prof. Carla Ferreira,

Thanks for your comments on our paper. Detailed comments and responses are as follows.

-----

Thank you very much for submitting your work to HESS. The manuscript presents a new machine learning method to downscale precipitation from satellite data. The topic is very interesting and fits well in the content of the journal, however, major revisions must be performed before publication.

[1] Please, consider all the comments suggested by the four reviewers. The comments are highly pertinent and relevant to improve the quality of your manuscript.

[Reply]

We will give detailed responses to the comments suggested by the four reviewers, and revisions will be performed on our paper based on the comments.

[2] Additionally, I suggest to improve the Discussion section, by better highlighting the advantages and limitation of the proposed method, including the outscalling potential to other areas/study sites, and the possibility/limitations of the methodology for other time scales (e.g. daily).

[Reply]

Based on the comments of the four reviewers, the limitations of the proposed method will be discussed and its potential will be shown in the revised paper.

[3] In Fig. 2, please correct the “Year-Month” format within the numbers in the xx axis. In Fig. 5, please specify the meaning of the red line. In Fig. 12, please specify in

the legend, within brackets, the wettest month (month and year) considered.

[Reply]

Our paper will be revised based on above mentioned comments.

[4] Authors are responsible for preparing their papers in correct English language, so please check and improve language editing.

[Reply]

Our paper will be fully polished.

Looking forward of the revised version of your manuscript!

Best wishes,

Chuanfa Chen

Baojian HU

Yanyan Li
